# Supplementary material for: Design of Imide Oligomer‐Mediated MOF Clusters for Solar Cell Encapsulation Systems by Interface Fusion Strategy
Source: PubMed Central journal article supplement (PMC10037975; doi:10.1002/advs.202206748), 2023-01-29
Supplement: ADVS-10-2206748-s001.pdf [file ADVS-10-2206748-s001.pdf]

## **Supporting Information**

### **Design of Imide Oligomer-Mediated MOF Clusters for Solar Cell Encapsulation Systems by Interface Fusion Strategy**

Minghong Wu<sup>a</sup>, Jiabin Li<sup>a</sup>, Xi Zhang<sup>a</sup>, Shumei Liu<sup>a</sup>, Jianqing Zhao<sup>\*a</sup>, and Weiqi Xie<sup>\*b</sup>

<sup>a</sup>School of Materials Science and Engineering, State Key Laboratory of Luminescent Materials and Devices, South China University of Technology, Guangzhou, 510640, P. R. China

<sup>b</sup>School of Minerals Processing and Bioengineering, Central South University, Changsha, 410083, P. R. China

#### **Corresponding authors**

\*Tel./Fax: +86-15913171507. E-mail: weiqixie@csu.edu.cn (Weiqi Xie)

\*Tel./Fax: +86-13609724000. E-mail: psjqzhao@scut.edu.cn (Jianqing Zhao)

## Characterizations

Fourier transform infrared (FT-IR) spectra were achieved on a Vertex70 spectrometer (Bruker) from  $400\text{ cm}^{-1}$  to  $4000\text{ cm}^{-1}$ . The molecular weight and distribution of 6FDA-TFMB were investigated by gel permeation chromatography (GPC, Waters) with a THF eluent. X-ray diffraction (XRD) was measured by a X-ray diffractometer (Bruker D8) from  $5^\circ$  to  $60^\circ$  ( $2\theta$ ). The morphology was observed by scanning electron microscope (SEM, Zeiss Merlin). Thermogravimetric analysis (TGA) was conducted by TG-209F1 TGA (Netzsch) from  $30\text{ }^\circ\text{C}$  to  $800\text{ }^\circ\text{C}$  under nitrogen atmosphere.  $\text{N}_2$  adsorption-desorption isotherms were tested by a fully automated specific surface area and porosity analyzer (Micromeritics ASAP 2460). X-ray photoelectron spectroscopy (XPS, Thermo Scientific K-Alpha) was performed to investigate the elemental compositions. The optical properties were collected by a UV-Vis spectrophotometer (HITACHI U-3900H).  $J-V$  curves were measured by a Keithley 2400 sourcemeter (TEKTRONIX) under one sun illumination (AM 1.5G,  $100\text{mW cm}^{-2}$ ) with a scan speed of  $100\text{ mV s}^{-1}$ . Dielectric properties were assessed by a HP4284A capacitance analyzer (Agilent) from 1 MHz to 100 MHz, and those at high frequency were investigated by Microwave vector network analyzer PNA-N5244A (Agilent) from 9 to 12 GHz with waveguide method. Water absorption was evaluated by placing samples to deionized water at room temperature for 7 days according to ASTM D570-98 (2018) standard. Water contact angle was recorded by DSA100 (KRUSS) at room temperature. Tensile properties were analyzed using Instron-5967 testing machine according to ASTM D638-08 standard. Impact properties were investigated using Zwick-5113 impact testing machine according to ASTM D256-10 standard.

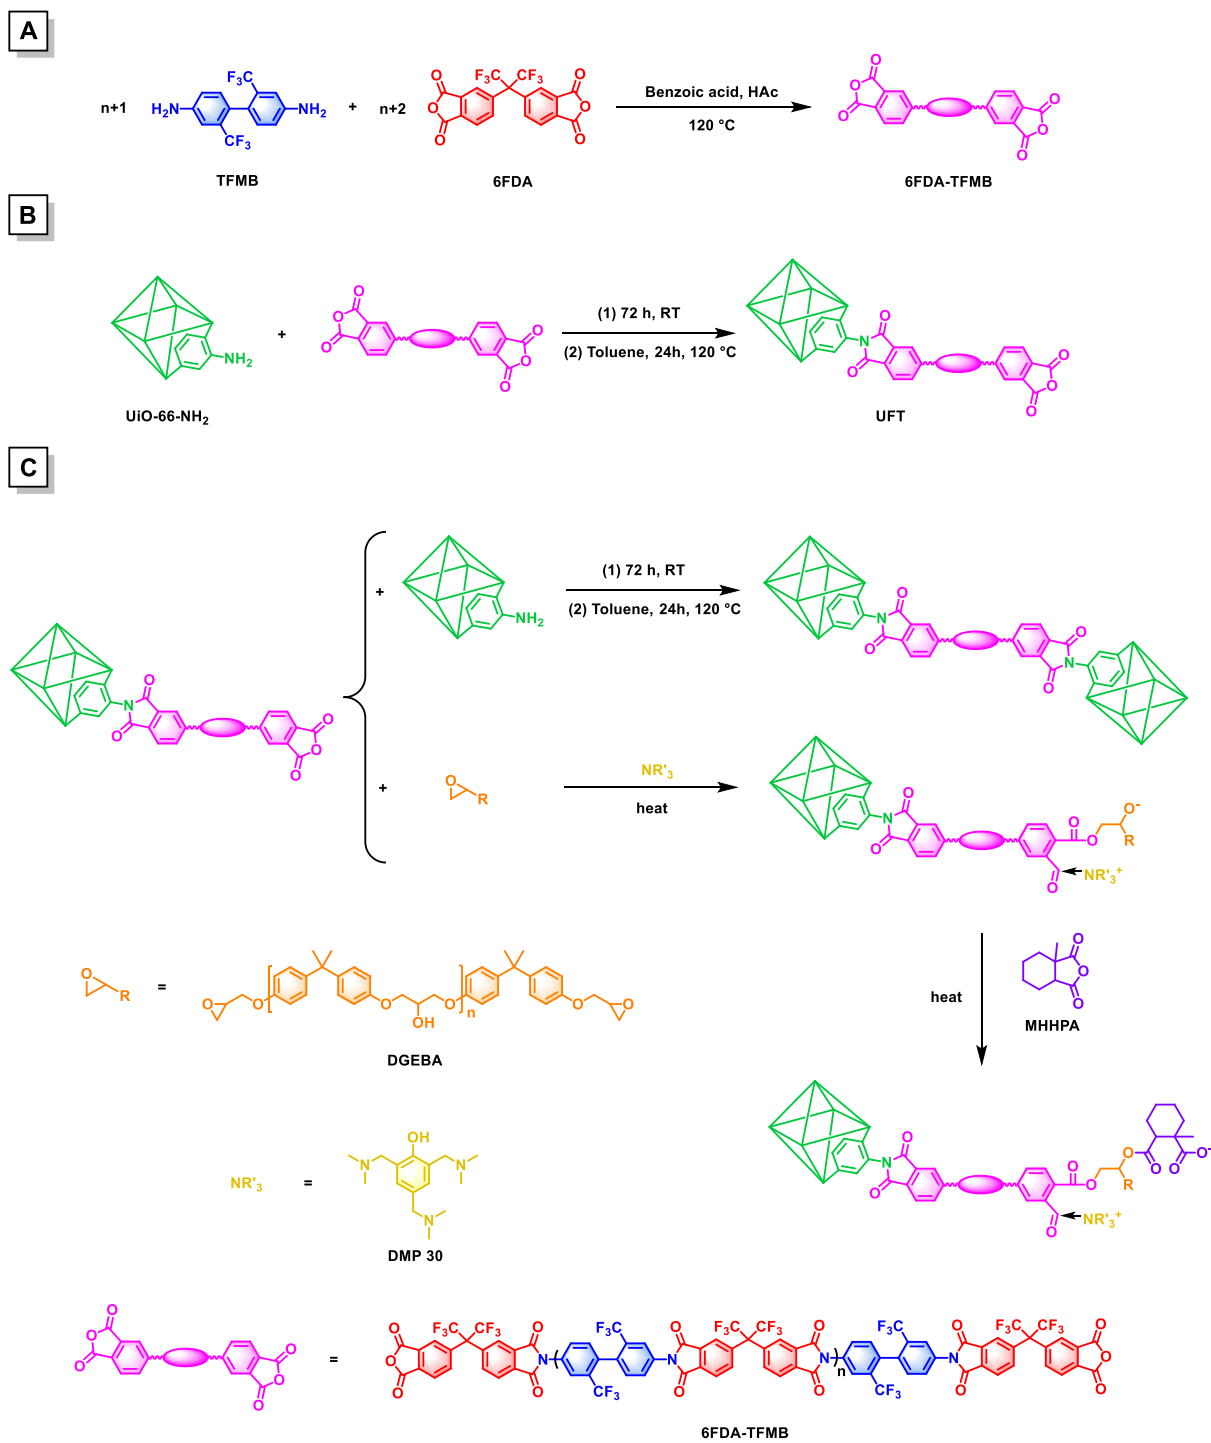

**Fig. S1** Synthetic routes of 6FDA-TFMB, UFT, and UFT epoxy composites

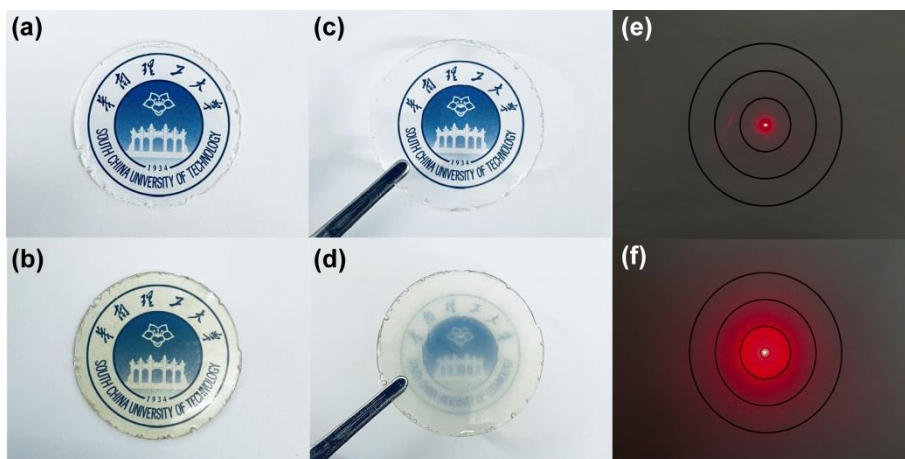

**Fig. S2** Optical images of (a) 6FT-0.5 and (b) UiO-0.5 in contact with the paper. Optical images of (c) 6FT-0.5 and (d) UiO-0.5 away from the paper. Scattering effects of (e) 6FT-0.5 and (f) UiO-0.5

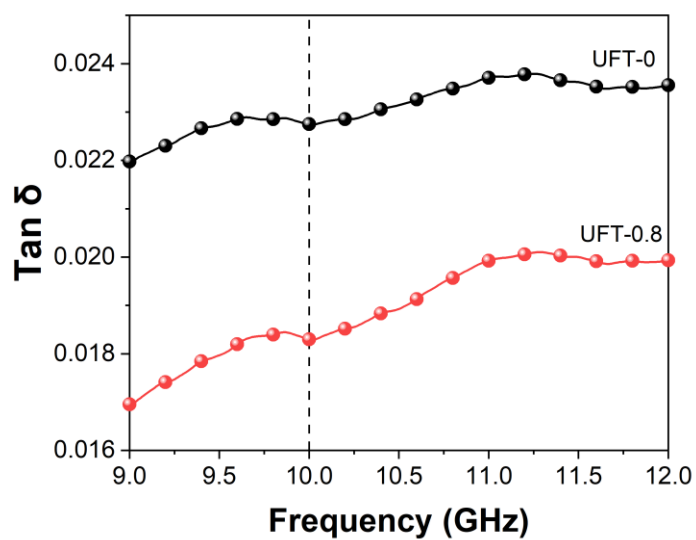

**Fig. S3**  $\text{Tan } \delta$  of UFT-0 and UFT-0.8 at 9 GHz - 12 GHz

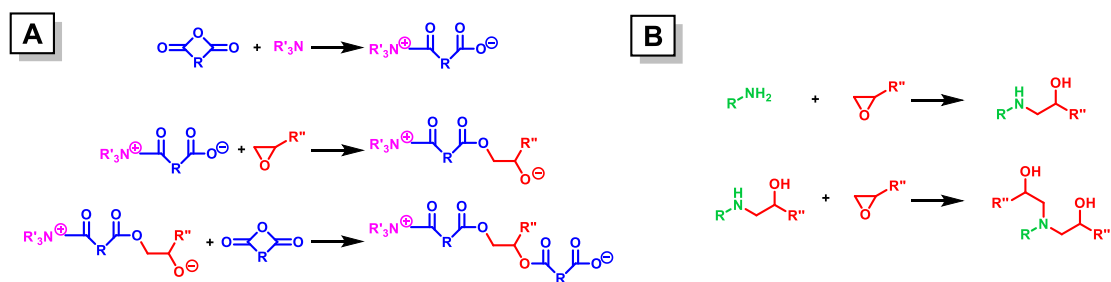

**Fig. S4** Comparison of the reaction mechanism of (A) anhydride and (B) amino groups with epoxy groups

**Table S1** Stoichiometric formulation of UFT-modified epoxy system

| Samples* | DGEBA<br>(wt%) | MHHPA<br>(wt%) | UFT<br>(wt%) | DMP-30<br>(wt%) |
|----------|----------------|----------------|--------------|-----------------|
| UFT-0    | 53.59          | 45.91          | 0            | 0.5             |
| UFT-0.5  | 53.32          | 45.68          | 0.5          | 0.5             |
| UFT-0.8  | 53.16          | 45.54          | 0.8          | 0.5             |
| UFT-1    | 53.05          | 45.45          | 1            | 0.5             |

\* Sample name: UFT-X, X represents the content (wt%) of UFT.

**Table S2** GPC results of imide oligomers 6FDA-TFMB

|   | $M_n$ ( $\times 10^3$ g/mol) | PDI  |
|---|------------------------------|------|
| 1 | 9.3                          | 1.13 |
| 2 | 5.2                          | 1.01 |
| 3 | 3.6                          | 1.01 |
| 4 | 2.1                          | 1.03 |

**Table S3** Thermal properties of UiO-66-NH<sub>2</sub>, 6FDA-TFMB and UFT

| Samples                | $T_{d\ 5\%}$ (°C) | Residual char at<br>800 °C (%) |
|------------------------|-------------------|--------------------------------|
| UiO-66-NH <sub>2</sub> | 383.0             | 47.1                           |
| 6FDA-TFMB              | 283.8             | 61.0                           |
| UFT                    | 325.7             | 55.3                           |

**Table S4** Some parameters of solar cells with UFT-0, UFT-0.5, UFT-0.8, and UFT-1

| Samples | PCE (%) | FF (%) | $J_{sc}$ (mA/cm <sup>2</sup> ) | $V_{oc}$ (V) |
|---------|---------|--------|--------------------------------|--------------|
| UFT-0   | 14.67   | 77.31  | 7.98                           | 2.38         |
| UFT-0.5 | 15.64   | 77.50  | 8.35                           | 2.42         |
| UFT-0.8 | 15.23   | 77.74  | 8.23                           | 2.38         |
| UFT-1   | 15.03   | 77.83  | 8.04                           | 2.40         |

**Table S5** Thermal properties of UFT composites

| Samples | $T_{d\ 5\%}$ (°C) | Residual char at<br>700 °C (%) |
|---------|-------------------|--------------------------------|
| UFT-0   | 355.7             | 6.8                            |
| UFT-0.5 | 371.6             | 9.5                            |
| UFT-0.8 | 380.0             | 10.3                           |
| UFT-1   | 371.1             | 10.5                           |

**Table S6** Mechanical properties of UFT composites

| Samples | Tensile strength<br>(MPa) | Elongation at<br>breaking (%) | Impact strength<br>(kJ/m <sup>2</sup> ) |
|---------|---------------------------|-------------------------------|-----------------------------------------|
| UFT-0   | 63.4 ± 1.12               | 2.19 ± 0.16                   | 6.48±0.89                               |
| UFT-0.5 | 79.2 ± 1.40               | 3.72± 0.13                    | 11.95±0.45                              |
| UFT-0.8 | 81.2 ± 1.83               | 4.08 ± 0.19                   | 12.86±0.72                              |
| UFT-1   | 76.8 ± 1.44               | 3.39± 0.11                    | 9.31±1.14                               |

**Table S7** Comparison of the properties of UFT-0.8, EP-AB and glass

| Samples | Transmittance<br>at 500 nm | Haze<br>at 500<br>nm | Anti-UV<br>Abs at 350<br>nm | $\epsilon_r$ at<br>1MHz | Tensile<br>(MPa) | Water<br>absorption<br>(%) |
|---------|----------------------------|----------------------|-----------------------------|-------------------------|------------------|----------------------------|
| UFT-0.8 | 83%                        | 52%                  | 1.33                        | 3.1                     | 81               | 0.32                       |
| EP-AB   | 92%                        | 2%                   | 0.07                        | 4.6                     | 20               | 1.18                       |
| Glass   | 90%                        | 1%                   | 0.05                        | 5.8                     | 42               | 0.01                       |
